# Supplementary material for: High spin polarized Fe2 cluster combined with vicinal nonmetallic sites for catalytic ammonia synthesis from a theoretical perspective
Source: Royal Society of Chemistry journal article supplement (doi:10.1039/d1qi01083b), 2021-01-01
Supplement: d1qi01083b1.pdf [file d1qi01083b1.pdf]

## Supporting Information for

### **High spin polarized Fe<sub>2</sub> cluster combined with vicinal nonmetallic sites for catalytic ammonia synthesis by a theoretical perspective**

Hongdan Zhu,<sup>a</sup> Jolyon Aarons,<sup>b</sup> Qian Peng,<sup>a, \*</sup>

*a State Key Laboratory and Institute of Elemento-Organic Chemistry and Frontiers Science Center for New Organic Matter, College of Chemistry, Nankai University, Tianjin 300071, China.*

*b Key Laboratory of Advanced Energy Materials Chemistry (Ministry of Education), College of Chemistry, Nankai University, Tianjin, 300071, China.*

*Dedicated to the 100th anniversary of Chemistry at Nankai University.*

*\* Email: qpeng@nankai.edu.cn.*

## Table of Contents

|                                                                                                                                                                                |        |
|--------------------------------------------------------------------------------------------------------------------------------------------------------------------------------|--------|
| <b>1. Free energy calculation</b>                                                                                                                                              | S3     |
| <b>2. Microkinetic analysis</b>                                                                                                                                                | S4     |
| <b>3. Results and Discussion</b>                                                                                                                                               | S6     |
| <b>3.1 The vicinal nonmetallic sites-promoted Hydrogenation Mechanism</b>                                                                                                      | S6     |
| Optimized configurations for N <sub>2</sub> adsorption on Fe <sub>2</sub> /mpg-C <sub>3</sub> N <sub>4</sub> (Fig. S1 and Table S2)                                            | S6     |
| AIMD simulations for N <sub>2</sub> on Fe <sub>2</sub> /mpg-C <sub>3</sub> N <sub>4</sub> (Fig. S2)                                                                            | S7     |
| Optimized structures for the adsorption of *N <sub>2</sub> on C <sub>3</sub> N <sub>4</sub> and N-vacancy of C <sub>3</sub> N <sub>4</sub> (Fig. S3)                           | S8     |
| N <sub>2</sub> Direct dissociation on Fe <sub>2</sub> /mpg-C <sub>3</sub> N <sub>4</sub> (Fig. S4)                                                                             | S8     |
| Optimized adsorption configurations and Gibbs free energies for N <sub>2</sub> and H <sub>2</sub> on Fe <sub>2</sub> cluster (Fig. S5)                                         | S9     |
| Optimized configurations for N <sub>2</sub> and H <sub>2</sub> co-adsorption on Fe <sub>2</sub> /mpg-C <sub>3</sub> N <sub>4</sub> (Fig. S6)                                   | S9     |
| Hydrogen transfer in the N sites on Fe <sub>2</sub> /mpg-C <sub>3</sub> N <sub>4</sub> (Fig. S7)                                                                               | S10    |
| Nitrogen hydrogenation to generate *NNH on Fe <sub>2</sub> /mpg-C <sub>3</sub> N <sub>4</sub> (Fig. S8)                                                                        | S10    |
| The Schematic depiction of association mechanisms on Fe <sub>2</sub> /mpg-C <sub>3</sub> N <sub>4</sub> (Fig. S9)                                                              | S11    |
| Preferred reaction pathway on Fe <sub>2</sub> /mpg-C <sub>3</sub> N <sub>4</sub> (Fig. S10)                                                                                    | S11    |
| Energy profiles and structures of association mechanisms on Fe <sub>2</sub> /mpg-C <sub>3</sub> N <sub>4</sub> (Fig. S11-14 and Table S3)                                      | S12-15 |
| Transition state energy barriers by use PBE and PBE-D3 functional (Table S4)                                                                                                   | S16    |
| N-H bond formation energy barriers in all hydrogenation mechanisms (Fig. S15)                                                                                                  | S16    |
| N <sub>2</sub> adsorption structures and TDTS on energy-degenerate Fe <sub>2</sub> /mpg-C <sub>3</sub> N <sub>4</sub> configurations (Fig. S16)                                | S17    |
| <b>3.2 The Mechanisms of Nitrogen Reduction on various Iron clusters</b>                                                                                                       | S18    |
| Energy profile and structures of association mechanisms on Fe <sub>n</sub> /mpg-C <sub>3</sub> N <sub>4</sub> (n=3,4) (Fig. S17-18)                                            | S18-19 |
| <b>3.3 Electronic structure analysis</b>                                                                                                                                       | S20    |
| MOs analysis of the Fe <sub>2</sub> N <sub>2</sub> Simplified model and Partial MOs of Fe <sub>2</sub> /mpg-C <sub>3</sub> N <sub>4</sub> (Fig. S19-20)                        | S20    |
| Projected electronic density of states (PDOS) of NH <sub>x</sub> NH <sub>y</sub> species (Fig. S21)                                                                            | S21    |
| <b>3.4 The efficient catalyst by B doping mpg-C<sub>3</sub>N<sub>4</sub></b>                                                                                                   | S22    |
| Gibbs free energy diagrams on the Fe <sub>2</sub> /mpg-C <sub>3</sub> N <sub>4</sub> (Fig. S22)                                                                                | S22    |
| Optimized adsorption configurations on Fe <sub>2</sub> /O/mpg-C <sub>3</sub> N <sub>4</sub> and Fe <sub>2</sub> /N/mpg-C <sub>3</sub> N <sub>4</sub> , respectively (Fig. S23) | S23    |
| Fe <sub>2</sub> dimer configurations on the B doped mpg-C <sub>3</sub> N <sub>4</sub> and the transformation of the two configurations (Fig. S24)                              | S23    |
| Optimized adsorption configurations on B doped Fe <sub>2</sub> /mpg-C <sub>3</sub> N <sub>4</sub> (Fig. S25)                                                                   | S24    |
| Hydrogen transfer processes in the C site on Fe <sub>2</sub> /B/mpg-C <sub>3</sub> N <sub>4</sub> (B) (Fig. S26)                                                               | S24    |
| Energy diagrams of association mechanisms on Fe <sub>2</sub> /B/mpg-C <sub>3</sub> N <sub>4</sub> (Fig. S27)                                                                   | S25    |
| Gibbs free energy diagram on the Fe <sub>2</sub> /B/mpg-C <sub>3</sub> N <sub>4</sub> (Fig. S28)                                                                               | S26    |
| <b>References</b>                                                                                                                                                              | S26    |

## 1. Free energy calculation

For adsorbed molecules, their translational and rotational freedoms are restricted. Thus, the contribution of translation and rotation to entropy and enthalpy will be significantly reduced. Generally, we consider that this part of the contribution is transformed into vibrational energy and all 3N vibrations of adsorbed molecules are used to calculate the correction of thermodynamic quantities. Therefore, when calculating the Gibbs free energy of the adsorbed molecules, the thermodynamic contribution generated by the vibration freedom will be mainly considered.

Taking the bottom of the potential energy well as the zero point, the vibration partition function under the resonance approximation can be expressed as:

$$q_{vir} = \prod_i \frac{e^{-hv_i/2kT}}{1 - e^{-hv_i/kT}} \quad (\text{eq-S1})$$

Where  $q_{vir}$ ,  $v_i$ ,  $h$  and  $k$  represent vibration partition function, vibration frequency, Planck constant and Boltzmann constant, respectively.

So, the corrections of internal energy ( $U_{vir}(T)$ ) and entropy ( $S_{vir}(T)$ ) at a certain temperature can obtain by equation eq-S2 and eq-S3:

$$U_{vir}(T) = R \sum_i \left( \frac{hv_i}{k} \right) \left( \frac{1}{2} + \frac{e^{-hv_i/kT}}{1 - e^{-hv_i/kT}} \right) \quad (\text{eq-S2})$$

$$S_{vir}(T) = R \sum_i \left\{ \frac{hv_i}{k} \frac{e^{-hv_i/kT}}{1 - e^{-hv_i/kT}} - \ln [1 - e^{-hv_i/kT}] \right\} \quad (\text{eq-S3})$$

And at 0 K, the zero-point vibrational energy (ZPE) of adsorbed molecules is:

$$ZPE = \frac{1}{2} \sum_i hv_i \quad (\text{eq-S4})$$

After vibrational frequency analysis, we can directly obtain the thermodynamic contribution and to calculate the corresponding Gibbs free energies at standard pressure and a certain temperature through VASPKIT code, a post-processing tool for VASP code <sup>1</sup>.

Different from adsorbed molecules, for gas molecules, the calculation of Gibbs free energy needs to consider the contributions of translational energy, rotational energy and vibrational energy at the same time, which increases the complexity of the calculation.

Under 0 K, there is:

$$U(0) = \varepsilon_{ele} + ZPE \quad (\text{eq-S5})$$

$$G(0) = H(0) = U(0) = \varepsilon_{ele} + ZPE \quad (\text{eq-S6})$$

Here, We can obtain the enthalpy and entropy at a certain temperature and standard pressure in the NIST-JANAF thermodynamics table. So, the Gibbs free energy at standard pressure can be calculated as:

$$G(T, p^0) = G(0, p^0) + \Delta G_{0 \rightarrow T} = \varepsilon_{ele} + ZPE + (\Delta H_{0 \rightarrow T} - T\Delta S_{0 \rightarrow T}) \quad (\text{eq-S7})$$

According to the the ideal gas equation of state, the Gibbs free energy at certain temperature and pressure can be obtained as:

$$G(T, p) = G(T, p^0) + RT \ln p/p^0 \quad (\text{eq-S8})$$

The zero-point vibrational energy and entropy corrections of gas molecules and adsorbed intermediate species involved in N<sub>2</sub>-to-NH<sub>3</sub> conversion at standard condition (T = 298.15 K and p<sup>0</sup> = 1 bar) are listed in Table S1.

**Table S1.** Free energy corrections for gas molecules and adsorbed intermediate species.

| Species                                                   | ZPE (eV) | TS (eV) | ZPE-TS (eV) |
|-----------------------------------------------------------|----------|---------|-------------|
| N <sub>2</sub>                                            | 0.15     | 0.57    | -0.42       |
| H <sub>2</sub>                                            | 0.27     | 0.39    | -0.12       |
| NH <sub>3</sub>                                           | 0.91     | 0.58    | 0.33        |
| N <sub>2</sub> *                                          | 0.20     | 0.09    | 0.11        |
| N <sub>2</sub> *+4H*                                      | 1.49     | 0.11    | 1.38        |
| N <sub>2</sub> * (B/g-C <sub>3</sub> N <sub>4</sub> )     | 0.20     | 0.09    | 0.11        |
| N <sub>2</sub> *+4H* (B/g-C <sub>3</sub> N <sub>4</sub> ) | 1.43     | 0.11    | 1.32        |

## 2. Microkinetic analysis

Microkinetic analysis of Fe<sub>2</sub>/mpg-C<sub>3</sub>N<sub>4</sub> and Fe<sub>2</sub>/B/mpg-C<sub>3</sub>N<sub>4</sub> by the Energetic Span model, proposed by Kozuch *et al*<sup>2</sup>, are conducted to further probe the reaction rate for the influence of B doping and the

catalytic performance. This theoretical model proposes that aside from the rate-limiting step, the steps before and after it also have impacts on the *TOF*, and thus the apparent activation energy rather than the activation energy of a single rate-limiting step can determine the whole reaction activity. In this model, the *TOF*-determining transition state (TDS) and *TOF*-determining intermediate (TDI) are used to identify the apparent activation energy ( $\delta G_a$ ) following Equation (eq-S9):

$$\delta G_a = \begin{cases} T_{TDS} - I_{TDI} & \text{if TDS appears after TDI} \\ T_{TDS} - I_{TDI} + \Delta G_r & \text{if TDS appears before TDI} \end{cases} \quad (\text{eq-S9})$$

Where, the TDS and the TDI are the TS and the intermediate that maximize the energetic span within the cyclic constraints, and thereby gauge the kinetics of the cycle.

The *TOF* can be calculated following Equation (eq-S10)

$$TOF = \frac{k_B T}{h} e^{-\delta G_a / k_B T} \quad (\text{eq-S10})$$

Because of the condition that the TDI and TDS must be the ones that maximize the energetic span, the determining states may be different from the extreme state of the energy graph. According to the reaction free energy diagrams from Fe<sub>2</sub>/mpg-C<sub>3</sub>N<sub>4</sub> and Fe<sub>2</sub>/B/mpg-C<sub>3</sub>N<sub>4</sub>, (Fig.S18 and Fig.S24):

$$TS(a3-a4) - I(a12) + \Delta G_r > TS(a1 - a2) - I(*N_2) \quad (\text{eq-S11})$$

Thus,  $T_{TDS}$  and  $I_{TDI}$  are  $TS(a3-a4)$  and  $a12$  respectively. In order to investigate the effect of different temperatures and pressures on the reaction rate, we plot a *TOF* map with pressure (1-100 bar) and temperature (300-700 K) of ammonia synthesis on Fe<sub>2</sub>/B/mpg-C<sub>3</sub>N<sub>4</sub> (Fig. 7b). In addition, we also considered the impact of different partial pressures on *TOF* (Fig. 7c). In addition, we also tried to carry out the Microkinetic modeling by using the CatMAP Software package<sup>3</sup> but it seems not to be applicable in our mechanism probably because multiple adsorption sites would lead the Microkinetic model much too complex to be solved.

### 3. Results and Discussion

#### 3.1. The vicinal nonmetallic sites-promoted Hydrogenation Mechanism

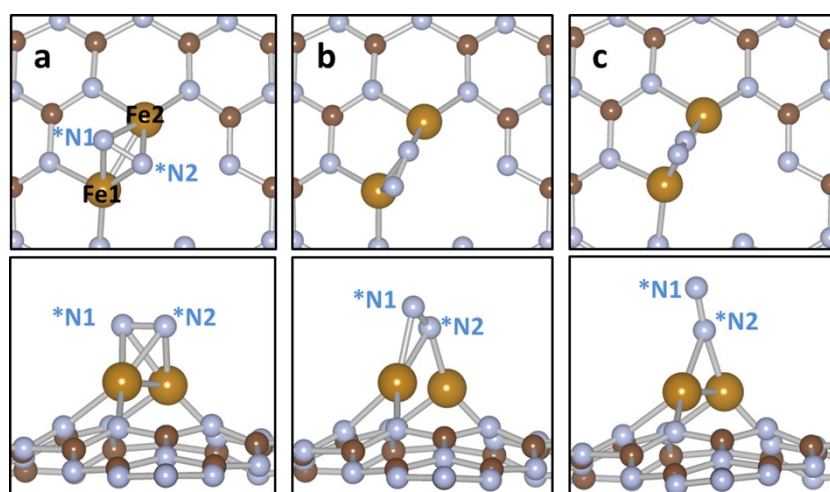

**Fig. S1.** Optimized configurations for  $N_2$  adsorption on  $Fe_2/mpg-C_3N_4$  (Gray: C, Silver: N, Golden; Fe).

**Table S2.** Structural properties of  $N_2$  adsorption configurations on  $Fe_2/mpg-C_3N_4$ .

| Adsorption Structures | Adsorption Model    | $E_{ads}/eV^{[a]}$ | Magnetic Moment/ $\mu$ | N-N bond Length/ $\text{\AA}$ | Bader charge of $N_2/ e $ |
|-----------------------|---------------------|--------------------|------------------------|-------------------------------|---------------------------|
| a                     | $\mu-\eta_2:\eta_2$ | -1.52              | 4.13                   | 1.25                          | -0.86                     |
| b                     | $\mu-\eta_2:\eta_1$ | -1.50              | 4.04                   | 1.20                          | -0.72                     |
| c                     | $\eta_1:\eta_1$     | -1.29              | 4.06                   | 1.16                          | -0.56                     |

[a]  $E_{ads}$  is the adsorption energy of the surface species, calculated according to eq-2.

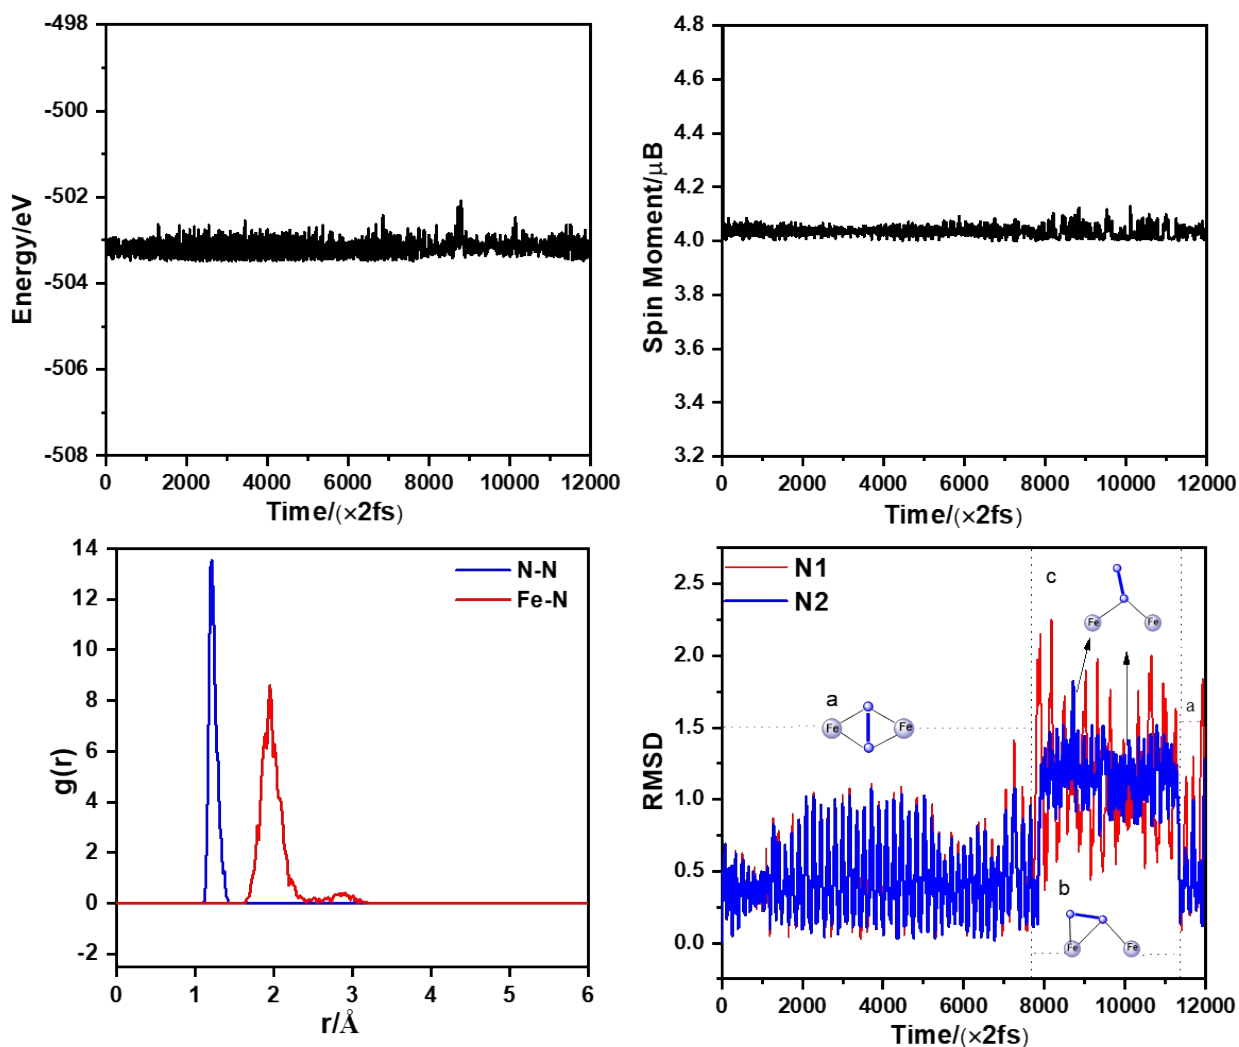

**Fig. S2.** AIMD simulations for on Fe<sub>2</sub>/mpg-C<sub>3</sub>N<sub>4</sub>. (a) Fluctuations of potential energy with time; (b) Spin moment change with time. (c) Radial distribution functions (RDFs) of Fe-N and N-N in N<sub>2</sub> adsorption constructions; (d) Root-mean-square deviation (RMSD) of \*N1 and \*N<sub>2</sub> in N<sub>2</sub> (Structure a is mainly distributed before 7800( × 2fs), after that, there are mainly structure b and a small amount of structure c. Structure a appeared again after 11300( × 2fs)).

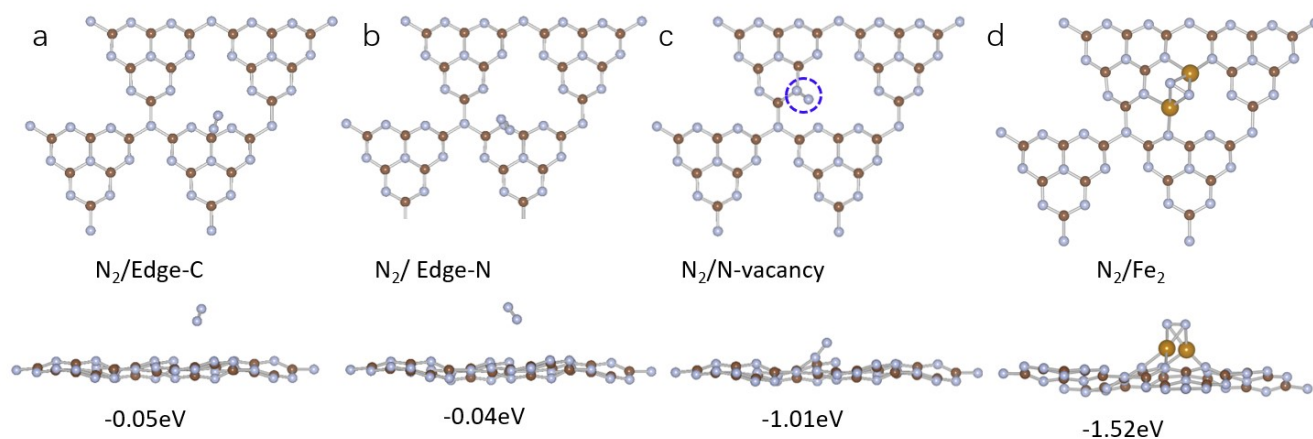

**Fig. S3.** Optimized structures for the adsorption of  $^*N_2$  on  $C_3N_4$  and N-vacancy of  $C_3N_4$ .

We have considered the adsorption of nitrogen on  $C_3N_4$ . As seen in Fig. S3, calculated results indicating that the  $C_3N_4$  cannot effectively stabilize and activate  $N_2$  (Fig. s3a-b). In comparison, N-vacancy (Fig. S3c) can adsorb and activate  $N_2$ , which was confirmed by recent literature<sup>4</sup>. However, the adsorption energy on the  $Fe_2$  site (Fig. S3d) is 0.51 eV more stable than that on N-vacancy. Therefore,  $Fe_2$  with high spin polarization is more favorable for activating nitrogen in our model.

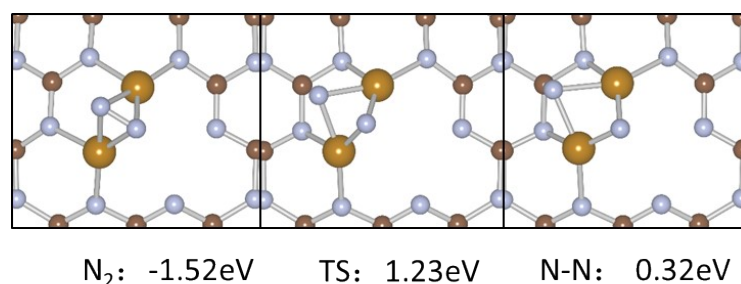

**Fig. S4.** Optimized configurations for  $N_2$  dissociation on  $Fe_2/mpg-C_3N_4$  (Pink: H, Gray: C, Silver: N, Golden: Fe).



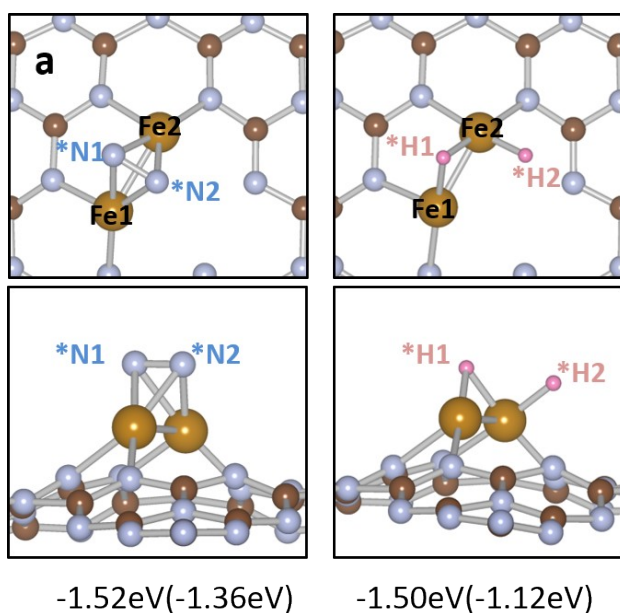

**Fig. S5.** Optimized adsorption configurations and Gibbs free energies for N<sub>2</sub> and H<sub>2</sub> on Fe<sub>2</sub> cluster. (Pink: H, Gray: C, Silver: N, Golden: Fe).

When considering the adsorption of reactants, we consider the adsorption of H<sub>2</sub> on Fe<sub>2</sub> cluster. As shown in Fig.S5, calculated results show that Nitrogen adsorption is more stable than hydrogen adsorption, especially the Gibbs free energy of nitrogen is 0.24eV more stable than hydrogen.

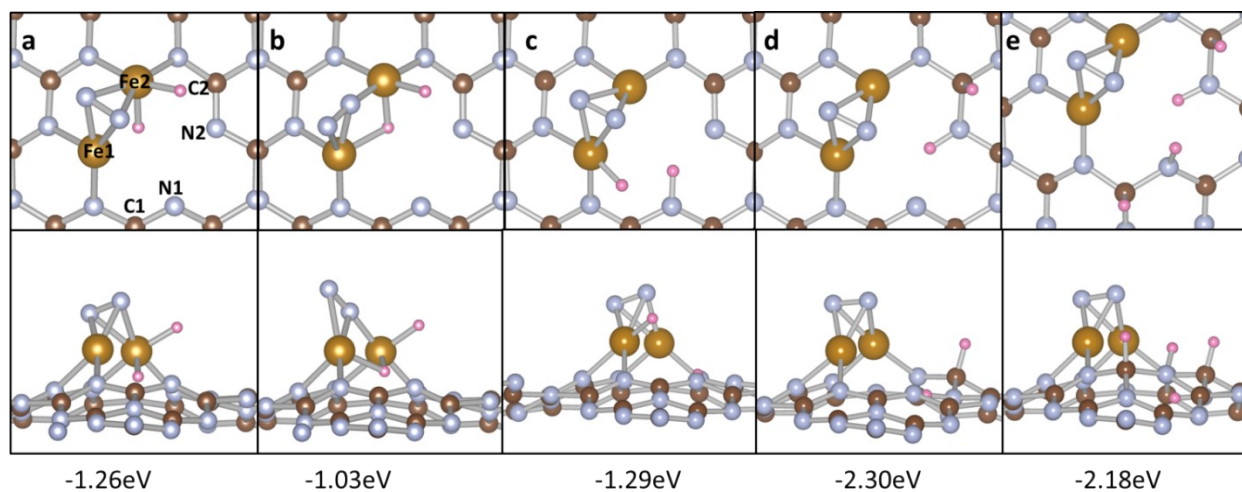

**Fig. S6.** Optimized configurations for N<sub>2</sub> and H<sub>2</sub> adsorption simultaneously on Fe<sub>2</sub>/mpg-C<sub>3</sub>N<sub>4</sub> (Pink: H, Gray: C, Silver: N, Golden: Fe).

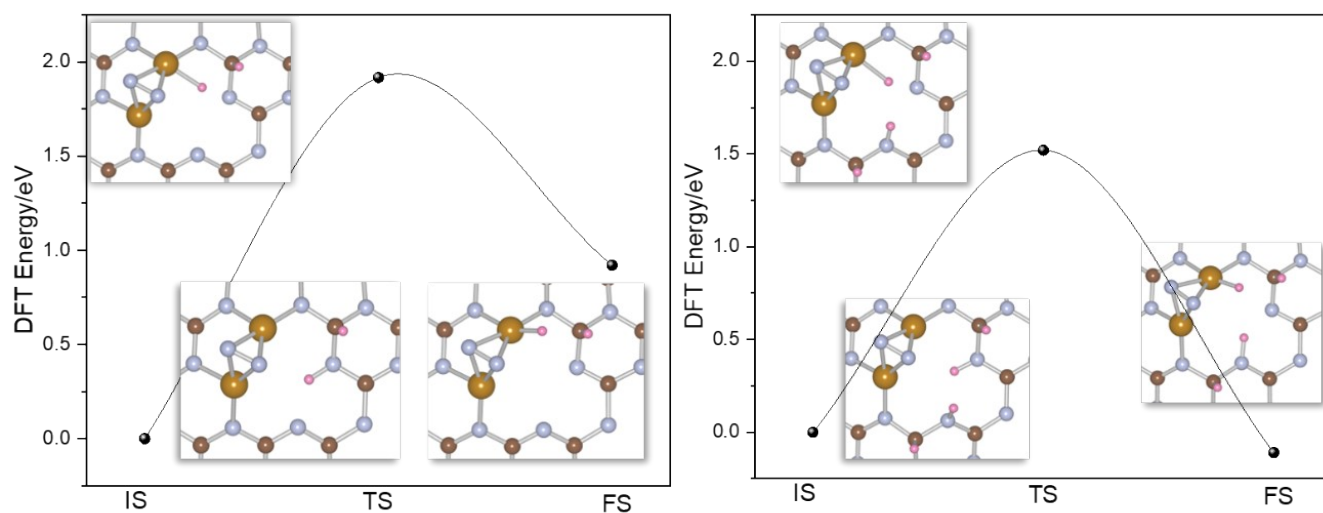

**Fig. S7.** Hydrogen transfer processes in the N sites on  $\text{Fe}_2/\text{mpg-C}_3\text{N}_4$  (Pink: H, Gray: C, Silver: N, Golden: Fe).

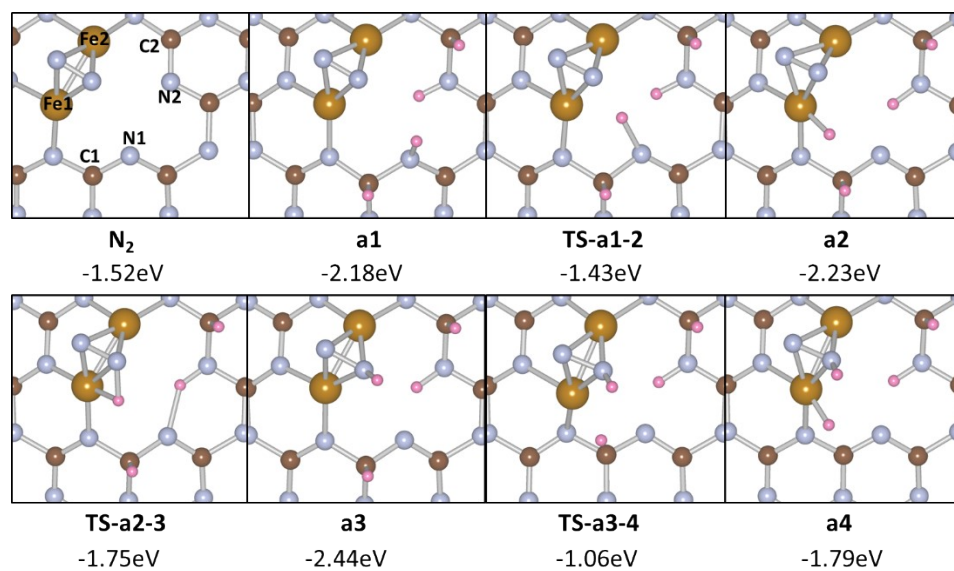

**Fig. S8.** Structures of the Hydrogen transfer process on  $\text{Fe}_2/\text{mpg-C}_3\text{N}_4$  (Pink: H, Gray: C, Silver: N, Golden: Fe).

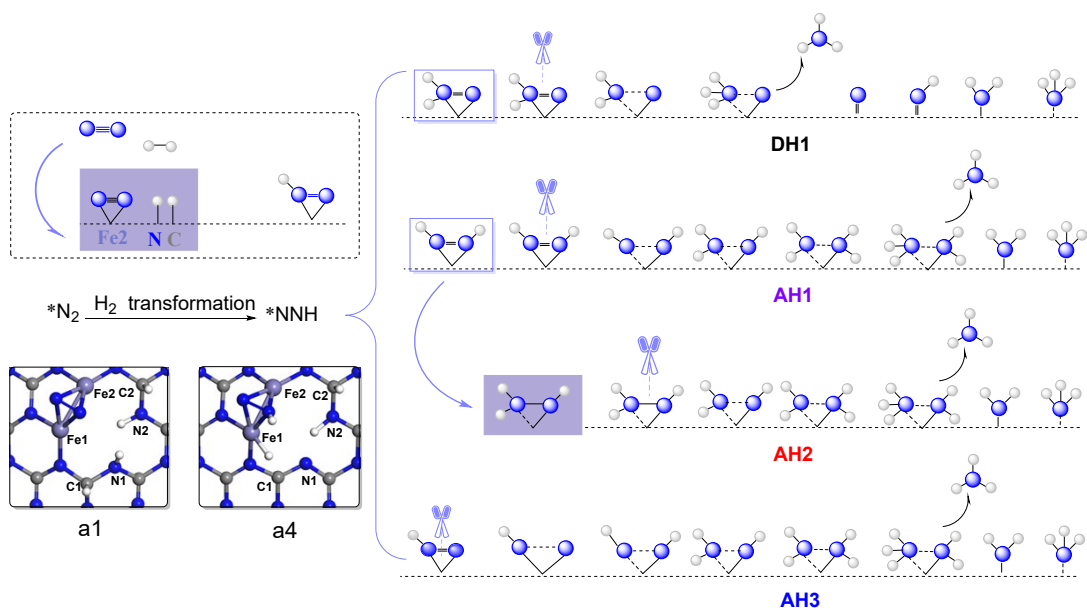

**Fig. S9.** Schematic depiction of four different association mechanisms for the thermal conversion of  $N_2$  to  $NH_3$  on  $Fe_2/mpg-C_3N_4$ . (AH and DH are abbreviations for Alternative and Distal Hydrogenation, respectively). The inset structures represent the co-adsorption configuration of  $N_2 + 2H_2$  and  $*NNH$  intermediate (a2 and a5 in Fig. 2)

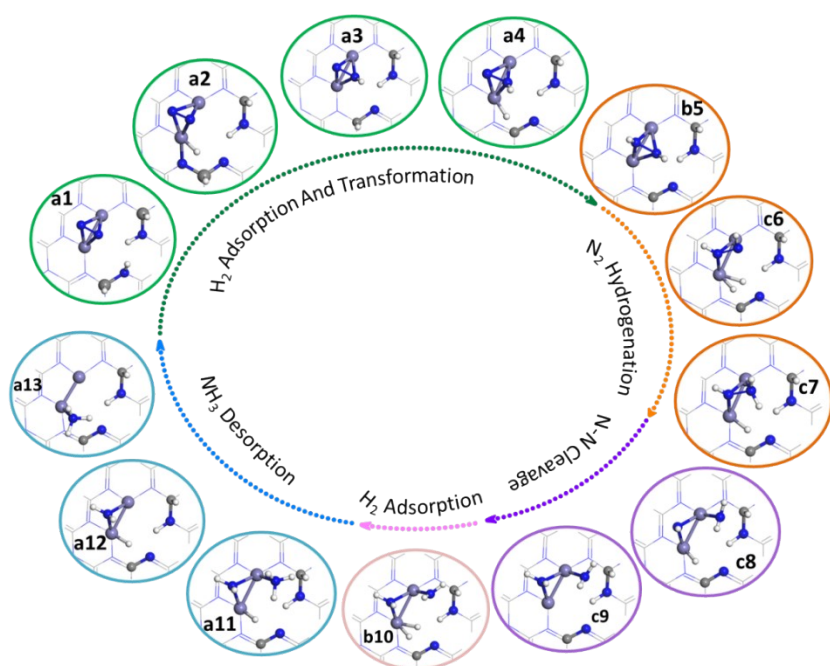

**Fig. S10.** Preferred reaction pathway for the thermal conversion of  $N_2$  to  $NH_3$  on  $Fe_2/mpg-C_3N_4$ .

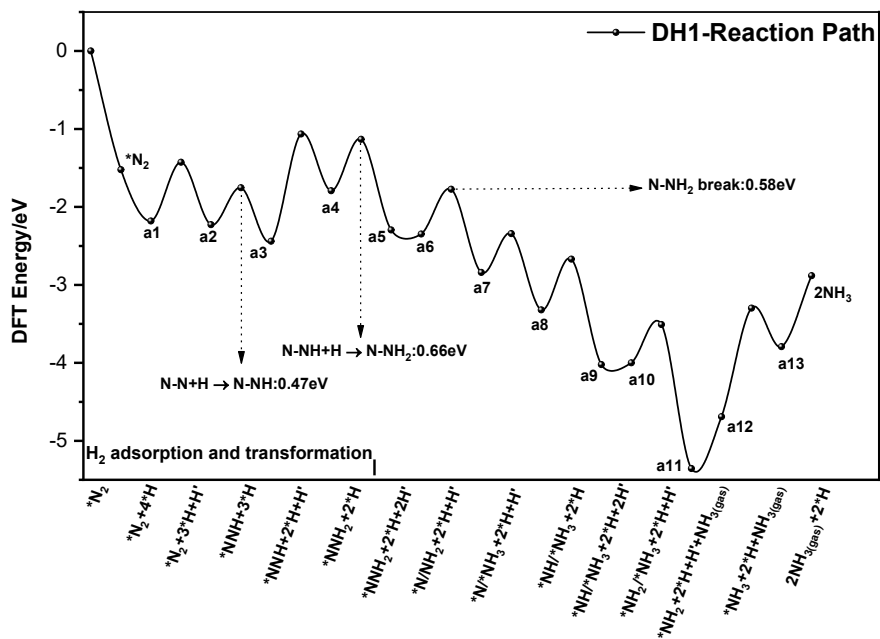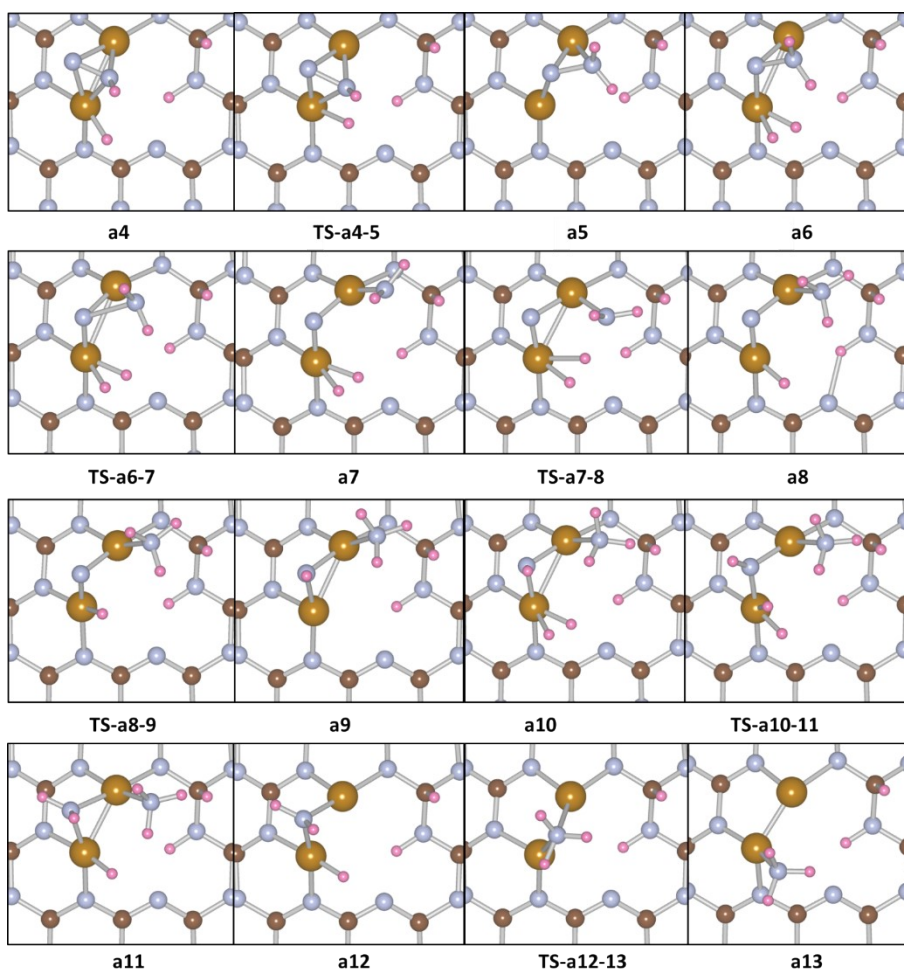

**Fig. S11.** Energy profile and structures of the surface species for the distal hydrogenation (DH1) of  $N_2$  on  $Fe_2/mpg-C_3N_4$  (Pink: H, Gray: C, Silver: N, Golden; Fe).

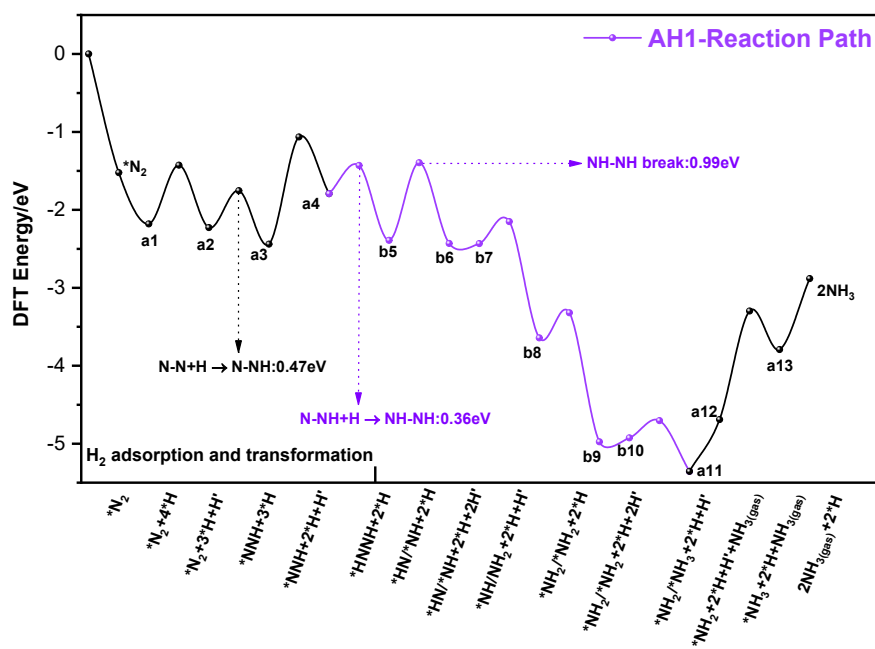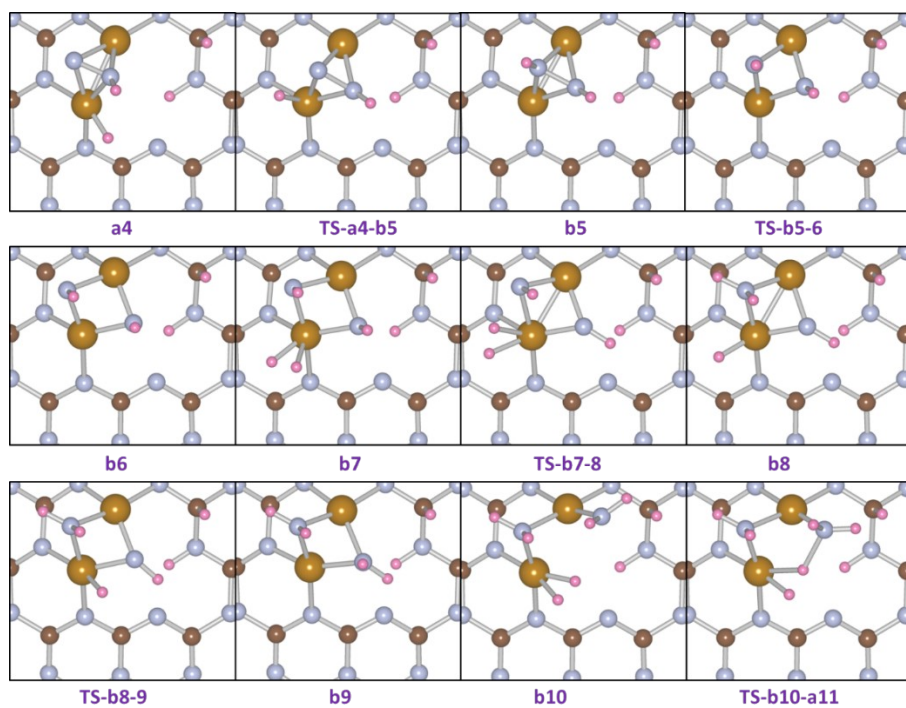

**Fig. S12.** Energy profile and structures of the surface species for the alternative hydrogenation (AH1) of  $N_2$  on  $Fe_2/mpg-C_3N_4$  (Pink: H, Gray: C, Silver: N, Golden: Fe).

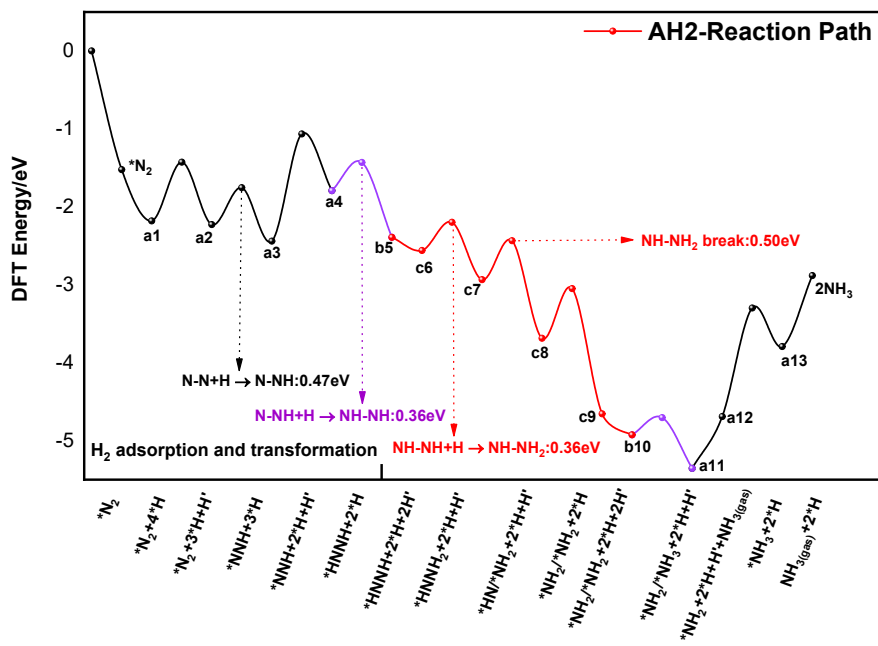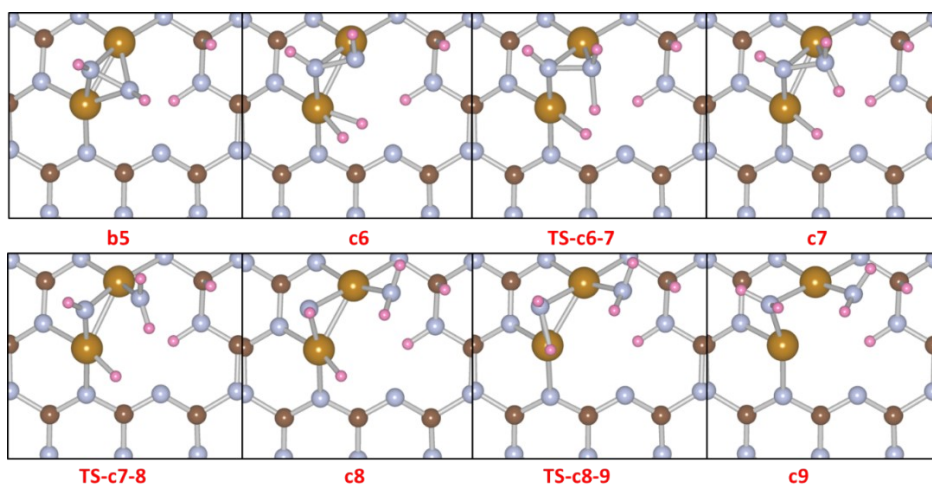

**Fig. S13.** Energy profile and structures of the surface species for the alternative hydrogenation (AH2) of  $\text{N}_2$  on  $\text{Fe}_2/\text{mpg-C}_3\text{N}_4$  (Pink: H, Gray: C, Silver: N, Golden; Fe).

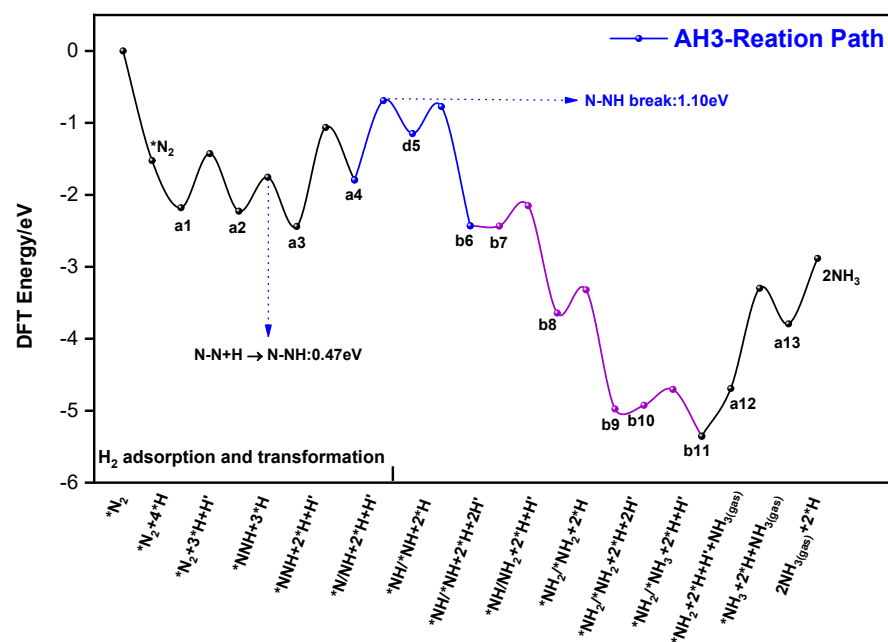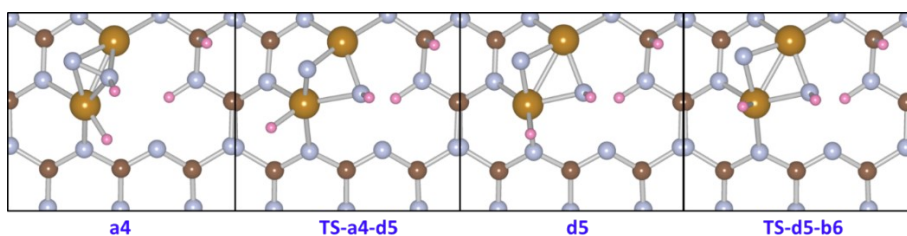

**Fig. S14.** Energy profile and structures of the surface species for the alternative hydrogenation (AH3) of  $N_2$  on  $Fe_2/mpg-C_3N_4$  (Pink: H, Gray: C, Silver: N, Golden: Fe).

**Table S3.** N-N bonds and Bader charge of  $N_2$  for  $NH_xNH_y$  ( $x=0-3, y=0-3$ ) intermediates on  $Fe_2/mpg-C_3N_4$ .

| $NH_xNH_y$ Intermediates | Adsorption Structures [a] | N-N break barriers/eV | Energy | N-N length/Å | bond | Bader charge/ e |
|--------------------------|---------------------------|-----------------------|--------|--------------|------|-----------------|
| N-NH                     | a5                        | 1.10                  |        | 1.33         |      | -1.18           |
| NH-NH                    | b6                        | 0.99                  |        | 1.40         |      | -1.57           |
| N-NH <sub>2</sub>        | a7                        | 0.58                  |        | 1.43         |      | -1.48           |
| NH-NH <sub>2</sub>       | c8                        | 0.50                  |        | 1.44         |      | -1.60           |

[a] Adsorption Structures come from Fig. 2.

Table S4. Transition state energy barriers (eV) of several elementary reactions by use PBE functional and empirical dispersion correction (Grimme-D3) to PBE functional.

|          | PBE  | PBE(D3) |
|----------|------|---------|
| TS-a1-2  | 0.75 | 0.79    |
| TS-a2-3  | 0.47 | 0.47    |
| TS-a3-4  | 1.38 | 1.40    |
| TS-a4-b5 | 0.36 | 0.35    |
| TS-c6-c7 | 0.36 | 0.32    |
| TS-c7-c8 | 0.50 | 0.49    |

By comparing the transition state energy barriers of several elementary reactions in the optimal reaction pathway, we found that there will be a slight difference in energy when using the empirical dispersion correction (Grimme-D3) to PBE functional, but it will not affect the results of reaction mechanism.

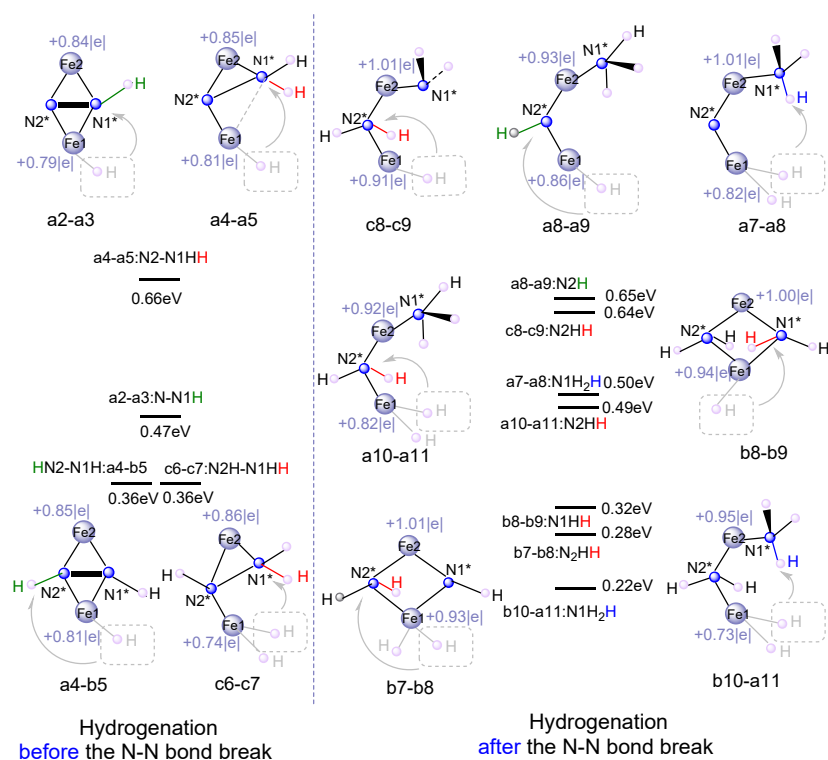

**Fig. S15.** N-H bond formation energy barriers in all hydrogenation mechanisms. (The hydrogen transferred on -N, -NH, and -NH<sub>2</sub> is labeled green, red and blue, respectively).



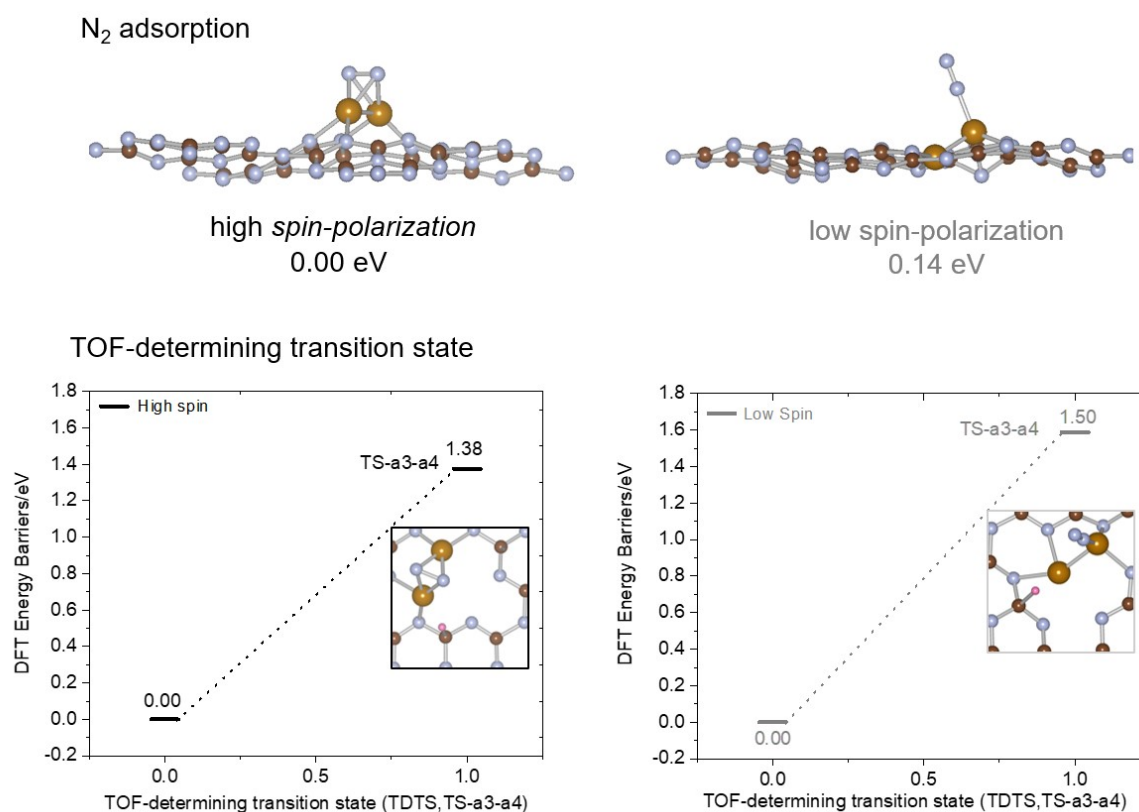

**Fig. S16.** Optimized N<sub>2</sub> adsorption structures and TOF-determining transition state on energy-degenerate Fe<sub>2</sub>/mpg-C<sub>3</sub>N<sub>4</sub> configurations. (Pink: H, Gray: C, Silver: N, Golden; Fe).

Indeed, we have indeed also found that there are two energy-degenerate configurations of Fe<sub>2</sub> on g-C<sub>3</sub>N<sub>4</sub>, exhibiting different spin-polarizations. However, in the thermal catalytic synthesis of ammonia, how to activate the inert nitrogen would be a key issue. Our calculation results show that high-spin polarized Fe<sub>2</sub> with stronger electron donating ability for 2π\* of N<sub>2</sub> is more beneficial to activate nitrogen based on N<sub>2</sub> adsorption (Fig. S16). In addition, the TOF-determining transition state (TDTS) (TS-a3-a4 in Fig. 3b of main text) on high-spin polarized Fe<sub>2</sub> is 0.12 eV lower than that on low-spin polarized Fe<sub>2</sub>, which would affect the reaction rate of the catalytic cycle. Thus, low-spin polarized Fe<sub>2</sub>/mpg-C<sub>3</sub>N<sub>4</sub> does not have a catalytic advantage in the thermal catalytic synthesis of ammonia.

### 3.2. Nitrogen Reduction Mechanisms on various Iron clusters

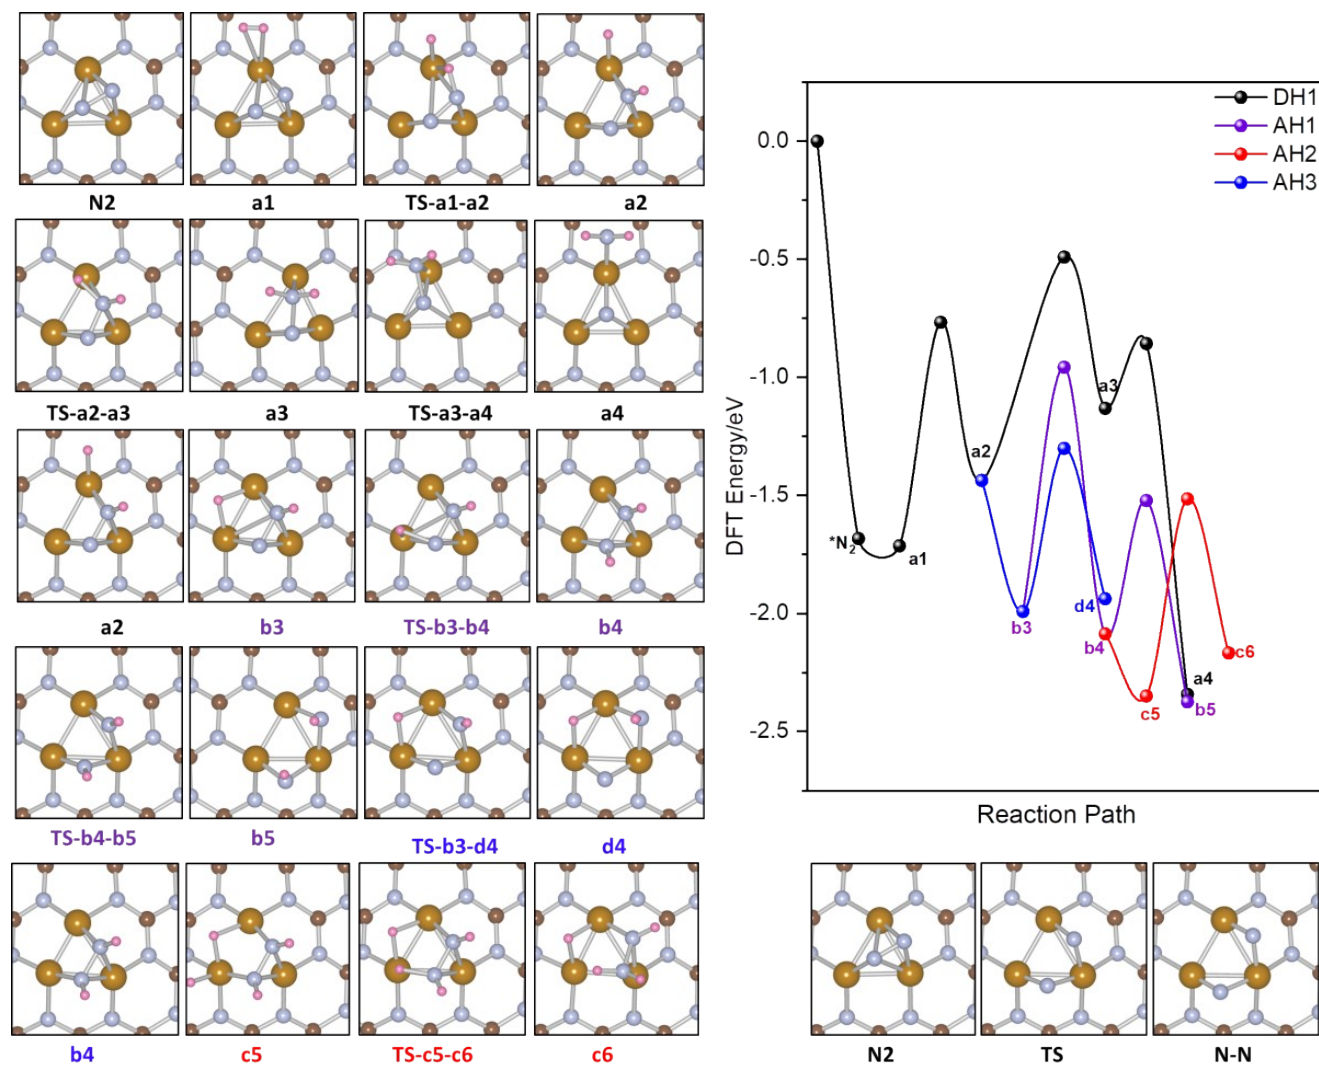

**Fig. S17.** Structures of the surface species and the energy profiles for the Nitrogen hydrogenation mechanisms on Fe<sub>3</sub>/mpg-C<sub>3</sub>N<sub>4</sub> (Pink: H, Gray: C, Silver: N, Golden; Fe).

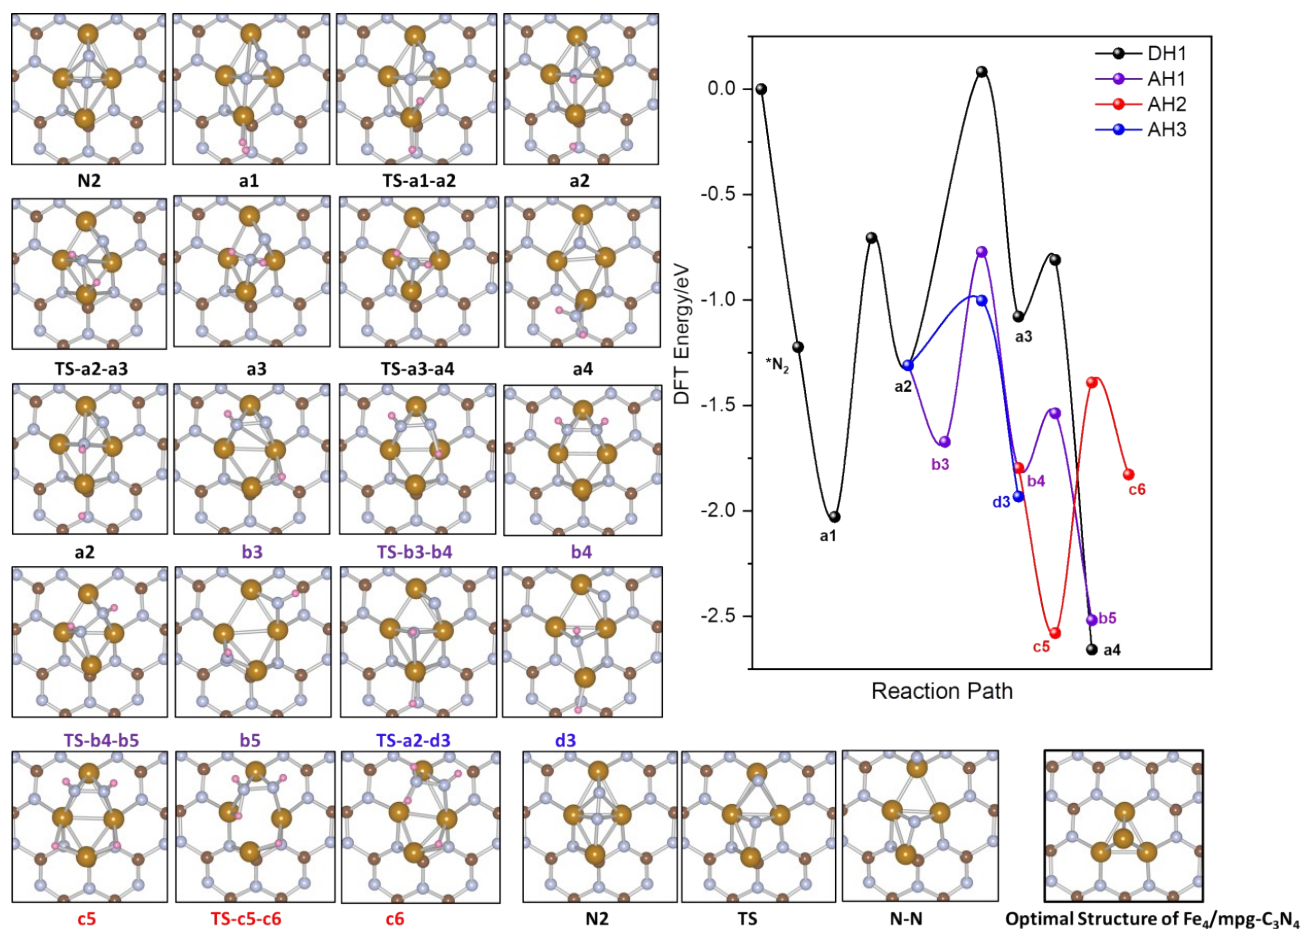

**Fig. S18.** Structures of the surface species and the energy profiles for the Nitrogen hydrogenation mechanisms on Fe<sub>4</sub>/mpg-C<sub>3</sub>N<sub>4</sub> (Pink: H, Gray: C, Silver: N, Golden; Fe). (Note that the Fe<sub>4</sub>/g-C<sub>3</sub>N<sub>4</sub> in this reaction pathway is not the most stable Fe<sub>4</sub> cluster, and we designed this structure only to study the effect of iron coordination numbers on the reaction mechanism).

### 3.3. Electronic structure analysis

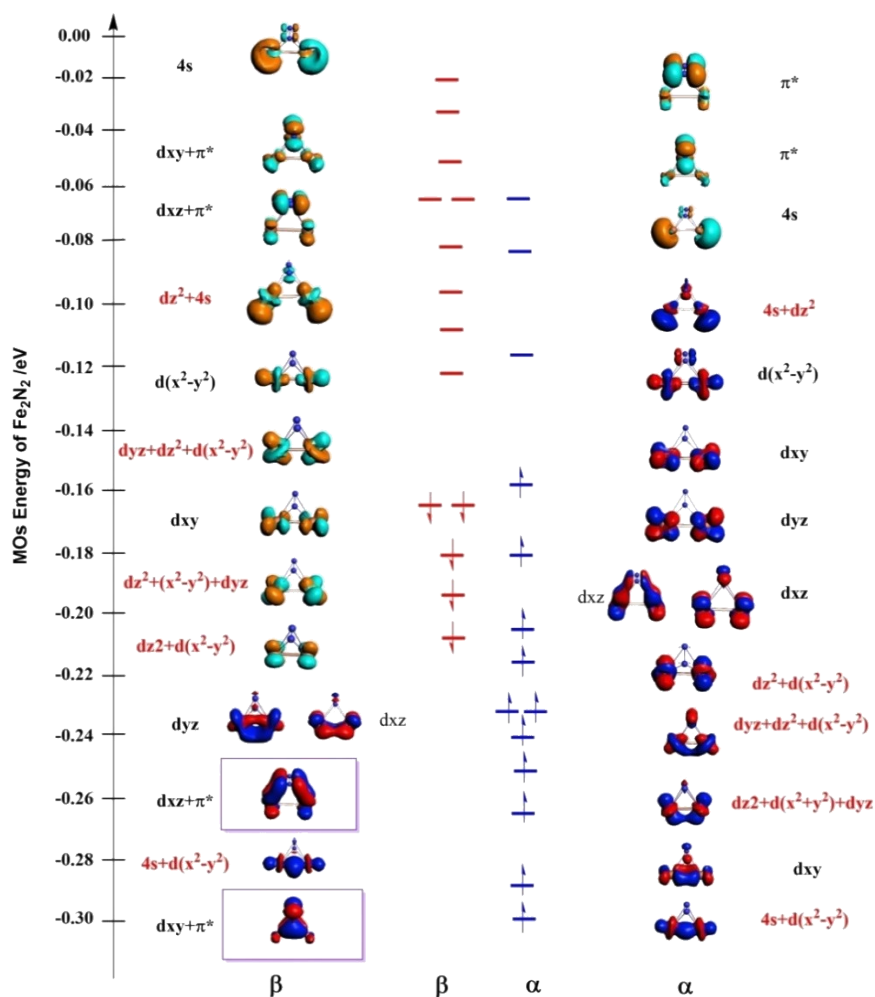

**Fig. S19.** MOs analysis of the  $\text{Fe}_2\text{N}_2$  Simplified model with  $C_{2v}$  configuration based on SR-ZORA PBE/DZP calculations and the energy levels of  $\text{Fe}_2$   $\alpha$ -orbitals are much lower than those of the  $\beta$ -orbitals. (The components of the orbitals marked in red are mixed, and the former has the most orbital components)

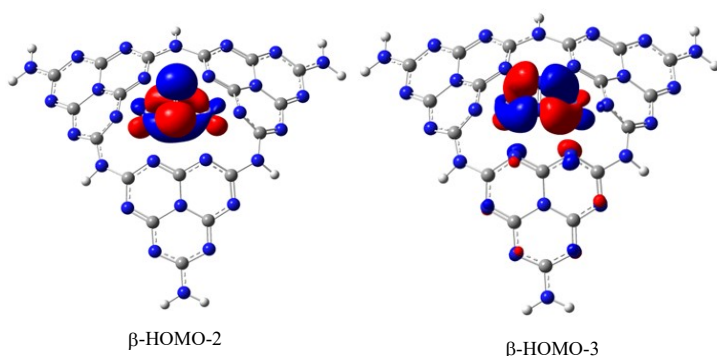

**Fig. S20.** Occupied partial molecular orbitals of the Nitrogen adsorption conformation on  $\text{Fe}_2/\text{mpg-C}_3\text{N}_4$  based on wb97xd/def2svp calculations, the shape of orbitals is consistent with the bond orbitals between nitrogen and simplified model  $\text{Fe}_2$  cluster (Fig. S17).

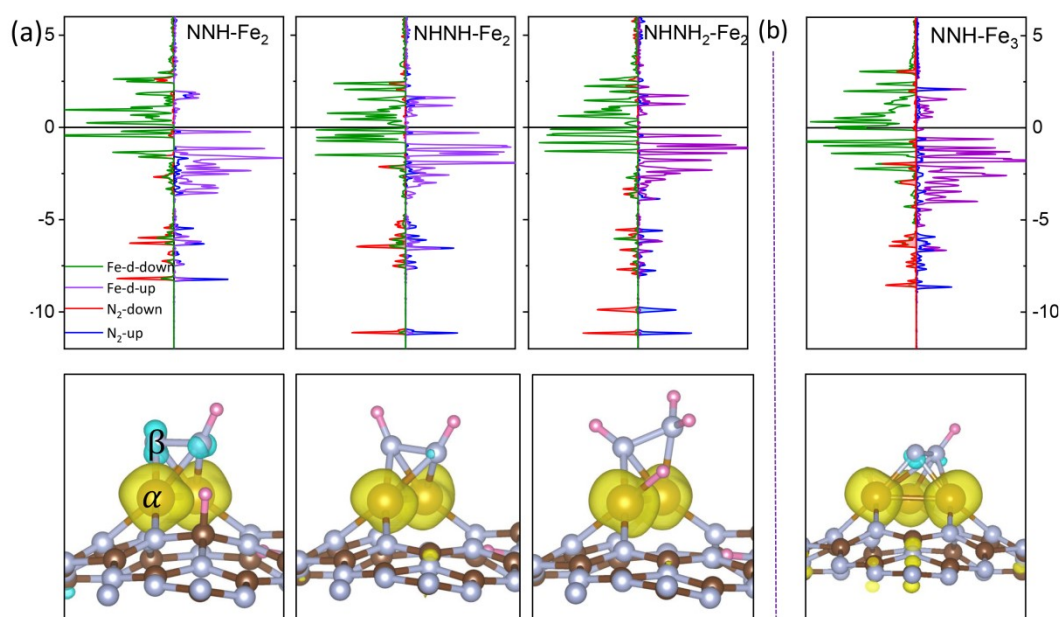

**Fig. S21** (a) Projected electronic density of states (PDOS) of  $\text{NH}_x\text{NH}_y$  species and corresponding spin densities in  $\text{Fe}_2/\text{mpg-C}_3\text{N}_4$ ; (b) Projected electronic density and spin density of  $^*\text{NNH}$  in  $\text{Fe}_3/\text{mpg-C}_3\text{N}_4$ .

To understand the unusual hydrogenation mechanism of  $\text{N}_2$  on the  $\text{Fe}_2/\text{mpg-C}_3\text{N}_4$ , projected density of states (PDOS) and spin densities for key intermediates were shown in Fig.S20. With continuous hydrogenation, both  $\text{Fe}_2$  clusters and absorbed hydrogens transfer their electrons to  $\text{N}_2$   $2\pi^*$  orbitals, which decreased the energy of the N-N anti-bond orbital and activates the N-N bond in Fig. 6a. The formed  $^*\text{NNH}$  has relatively high spin polarization to make the next hydrogenation favorable, forming  $^*\text{NHHH}$  via an alternate pathway. Because  $\alpha$ -spin electrons of  $\text{N}_2$   $2\pi^*$  orbitals keep increasing from  $^*\text{NN}$  to  $^*\text{NHHH}_2$ , the spin density for each intermediate is gradually eroded. After that, the following transformation would favor the dissociation of the N-N bond rather than additional hydrogenation. In contrast, the spin density of  $^*\text{NNH}$  in  $\text{Fe}_3/\text{g-C}_3\text{N}_4$  (Fig. 6b) is relatively low comparing with that in  $\text{Fe}_2/\text{g-C}_3\text{N}_4$ , and thus continuous hydrogenation was hindered.

### 3.4. The efficient catalyst by B doping mpg-C<sub>3</sub>N<sub>4</sub>

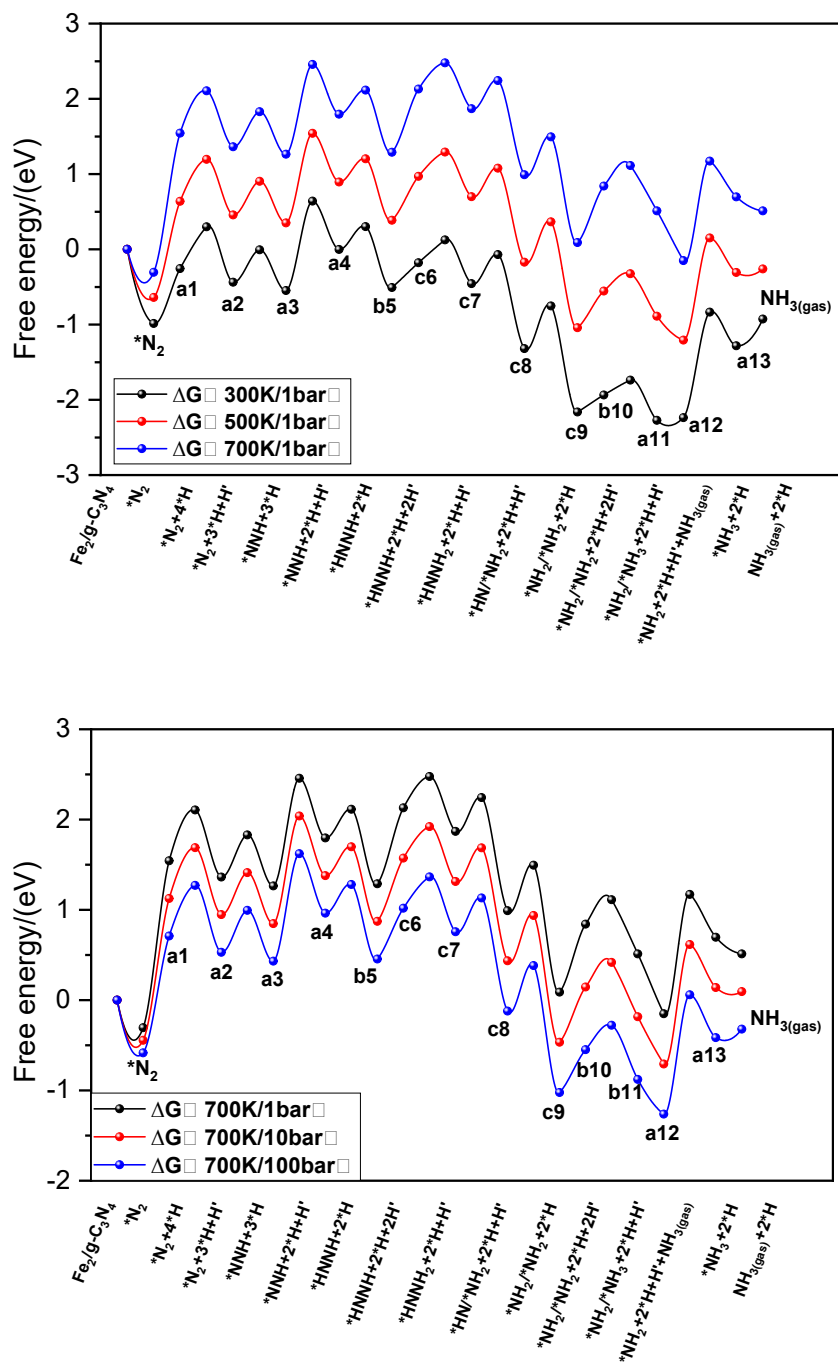

**Fig. S22.** Gibbs free energy diagram for ammonia synthesis on the Fe<sub>2</sub>/mpg-C<sub>3</sub>N<sub>4</sub>. Reaction conditions and parameters are: H<sub>2</sub>:N<sub>2</sub> ratio = 3:1 and NH<sub>3</sub> conversion is fixed at 10 %.

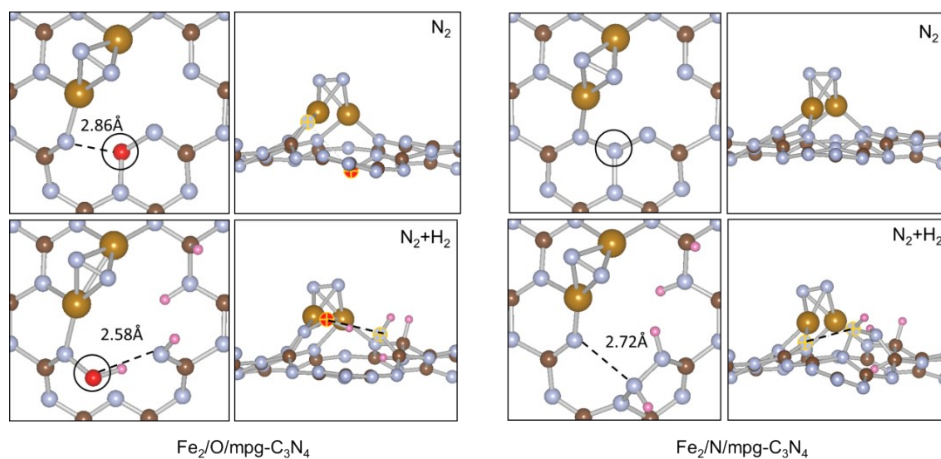

**Fig. S23.** Optimized  $N_2$  adsorption configurations and co-adsorptions of  $N_2$  and  $H_2$  on O / N doped  $Fe_2/mpg-C_3N_4$  ( $Fe_2/O/mpg-C_3N_4$  and  $Fe_2/N/mpg-C_3N_4$ ), respectively (Pink: H, Gray: C, Silver: N, red: O, Golden; Fe).

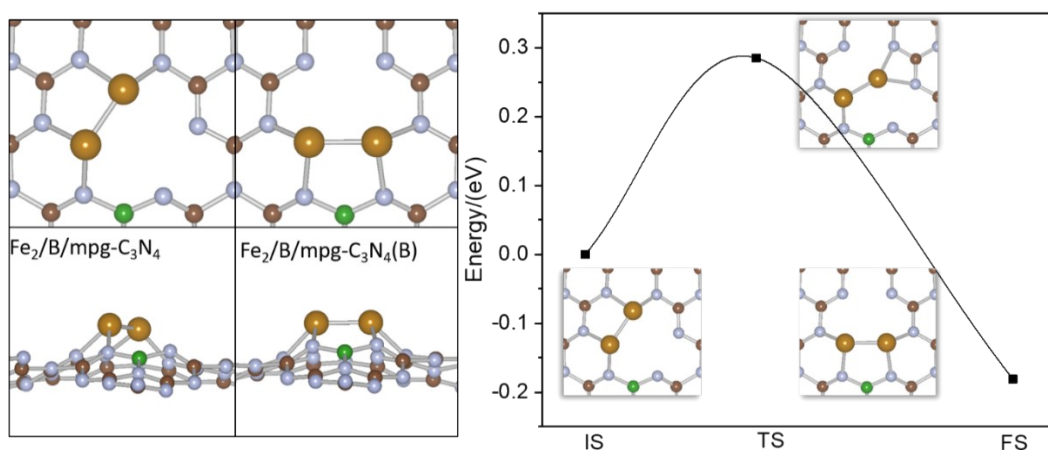

**Fig. S24.** Atomic configurations for  $Fe_2$  dimers on the B doped  $mpg-C_3N_4$  and the transformation of the two configurations, including IS, TS, and FS.

As seen in Fig. S23-S25, although the other  $Fe_2/B/mpg-C_3N_4(B)$ , is slightly stable in thermodynamics ( $\Delta E = -0.18 eV$ ), it is easy to transform into the  $Fe_2/B/mpg-C_3N_4$  in main text with kinetics barrier ( $E_a = 0.29 eV$ ). And the most stable adsorption energy of nitrogen for these two configurations is similar. When considering the co-adsorption of nitrogen and hydrogen, the B-N site of  $Fe_2/B/mpg-C_3N_4(B)$  configuration becomes unfavorable for the adsorption and activation of hydrogen (around 1.1 eV, see b/b' and c/c' in Fig. S24). Therefore, the  $Fe_2/B/mpg-C_3N_4$  in main text is stable with proper  $Fe_2$  binding for the efficient hydrogen transfer.

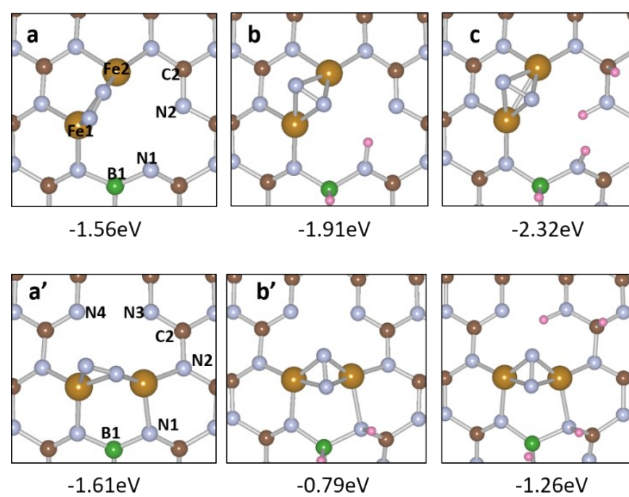

**Fig. S25.** Optimized  $N_2$  adsorption configurations and co-adsorptions of  $N_2$  and  $H_2$  on B doped  $Fe_2/mpg-C_3N_4$ , (Pink: H, Gray: C, Silver: N, green: B, Golden; Fe).

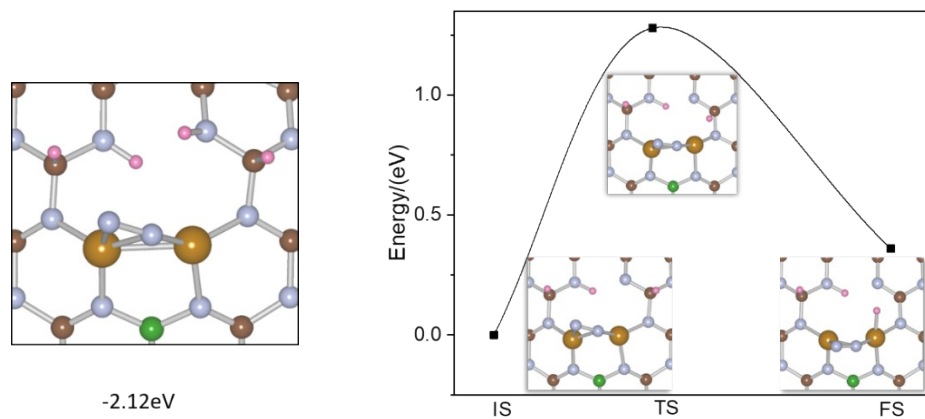

**Fig. S26.** Most co-adsorption configuration and hydrogen transfer processes in the C site on B doped  $Fe_2/mpg-C_3N_4$  ( $Fe_2/B/mpg-C_3N_4(B)$ ), (Pink: H, Gray: C, Silver: N, green: B, Golden; Fe).



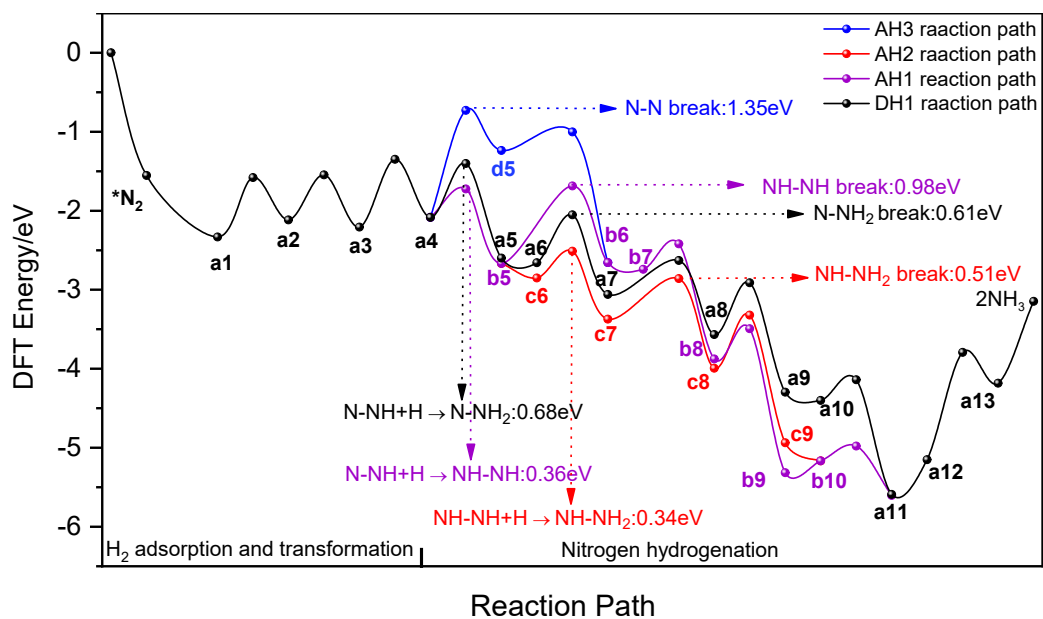

**Fig. S27.** Energy diagrams of four different association mechanisms for conversion of  $N_2$  to  $NH_3$  catalyzed by  $Fe_2/B/mpg-C_3N_4$ .

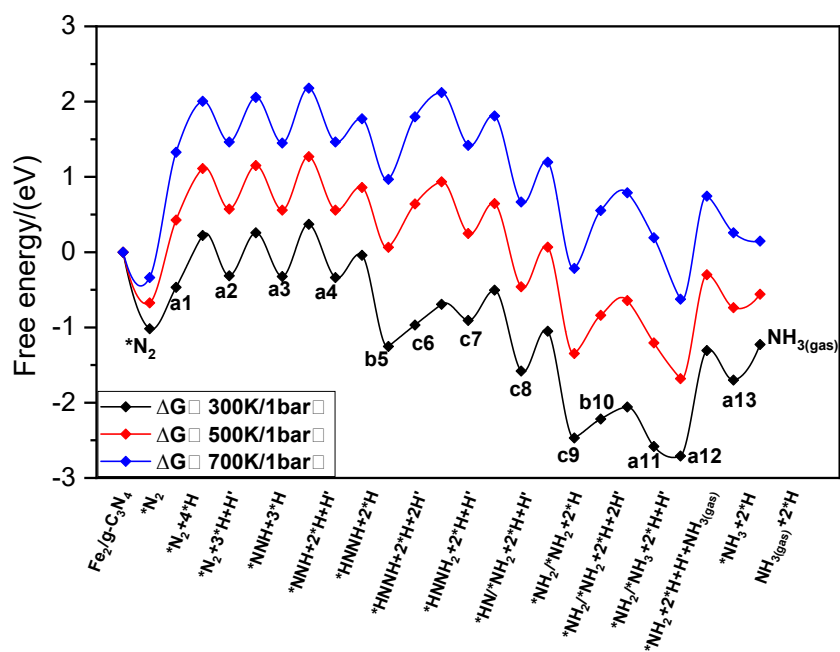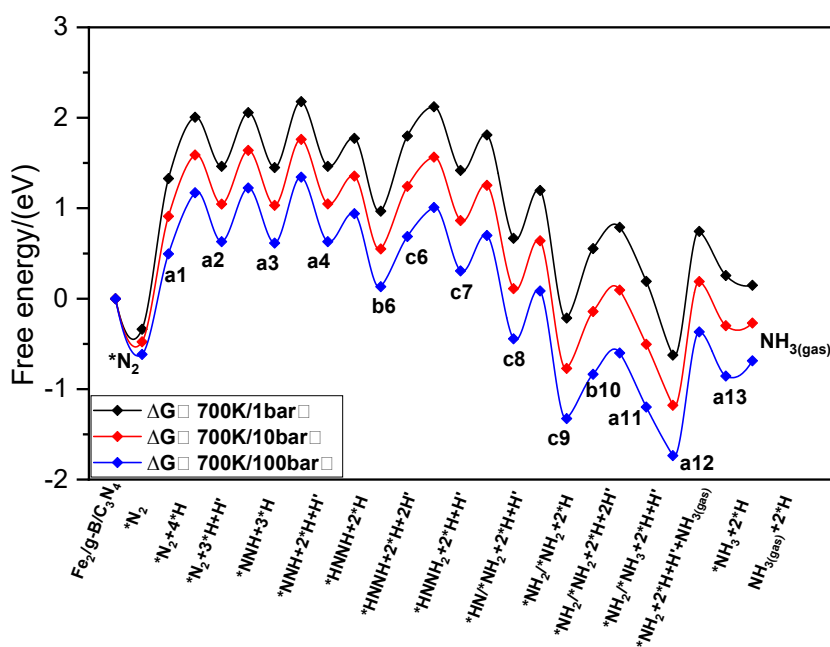

**Fig. S28.** Gibbs free energy diagram for ammonia synthesis on the  $\text{Fe}_2/\text{B}/\text{mpg-C}_3\text{N}_4$ . Reaction conditions and parameters are:  $\text{H}_2:\text{N}_2$  ratio = 3:1 and  $\text{NH}_3$  conversion is fixed at 10 %.

## References

- 1 V. Wang, N. Xu, J. C. Liu, G. Tang, W. T. Geng, VASPKIT: A user-friendly interface facilitating high-throughput computing and analysis using VASP code, *Comput. Phys. Commun.* 2021, **267** 108033.
- 2 K. Sebastian, S. Sason, How to Conceptualize Catalytic Cycles? The Energetic Span Model, *Acc. Chem. Res.* 2011, **44** 101-110.
- 3 A. J. Medford, C. Shi, M. J. Hoffmann, A. C. Lausche, S. R. Fitzgibbon, T. Bligaard and J. K. Nørskov, CatMAP: A Software Package for Descriptor-Based Microkinetic Mapping of Catalytic Trends, *Catal. Lett.* 2015, **145** 794-807.
- 4 Z. Zhao, Y. Long, S. Luo, Y. Luo, M. Chen, J. Ma, Metal-Free  $\text{C}_3\text{N}_4$  with plentiful nitrogen vacancy and increased

specific surface area for electrocatalytic nitrogen reduction, *J. Energy Chem.* 2021, **60** 546-555.
